# Supplementary material for: Uremic Toxins Induce ET-1 Release by Human Proximal Tubule Cells, which Regulates Organic Cation Uptake Time-Dependently
Source: MDPI journal article supplement (doi:10.3390/cells4030234), 2015-06-26
Supplement: s1 [file s1]

## Supplementary Materials

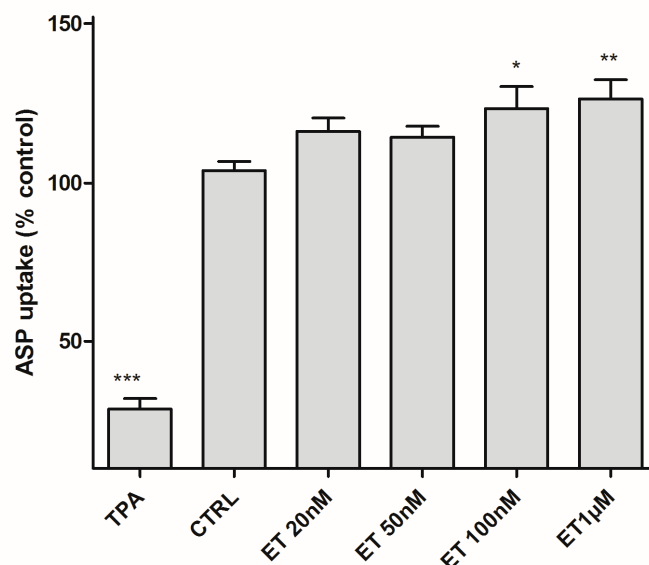

**Figure S1.** ciPTEC ASP<sup>+</sup> uptake levels, after exposure to a dose-range of ET-1 for 24 hours. CiPTEC monolayers were incubated for 15 min in medium containing 10 µM ASP<sup>+</sup> without or with pre-incubation with 0-1 µM ET-1, for 24 hours. As a control, the OCT inhibitor 100 µM TPA was used which inhibited ASP<sup>+</sup> uptake by approx. 70%. Subsequently, the reaction was stopped, the cells were lysed and the fluorescent signal was measured as described in the methods section. Values are expressed as mean ± SEM for 2 experiments performed in triplicate. (\*  $p < 0.05$ , \*\*  $p < 0.01$ , \*\*\*  $p < 0.001$ ).

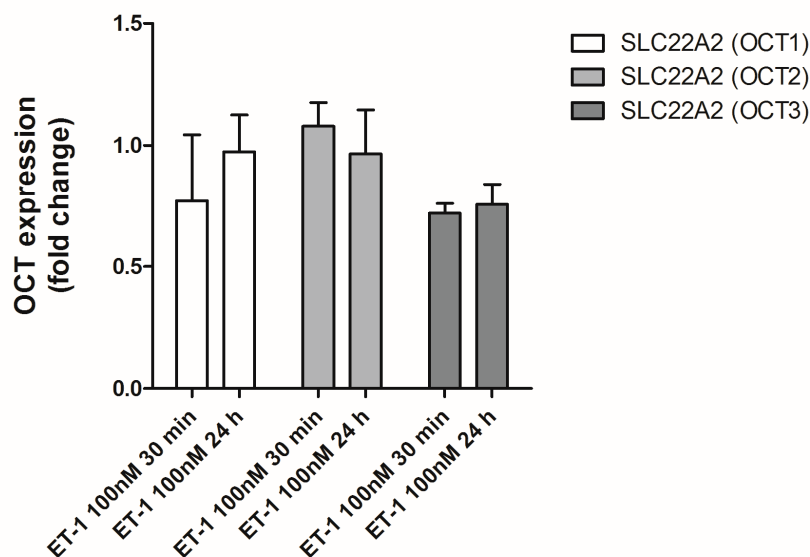

**Figure S2.** ET-1 does not significantly change OCT expression on mRNA level. Fold changes in mRNA expression levels of OCT2 corrected for corresponding GAPDH mRNA levels expressed as fold increase compared to non- ET-1 exposed ciPTEC (Control ciPTEC  $\Delta c(t)$  values OCT1:  $15 \pm 0.7$ , OCT2:  $18 \pm 0.52$ , OCT3:  $8 \pm 0.5$ )
